# Supplementary material
Source: PubMed Central journal article supplement (PMC9362068)

Raw data  
Microscope images used for H&E cell  
counting

C57 Mice  
0 h post-nebulization with S-RBD

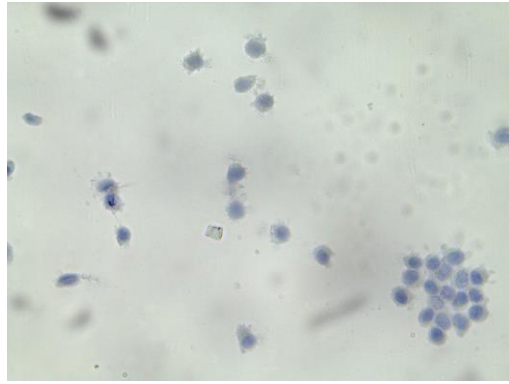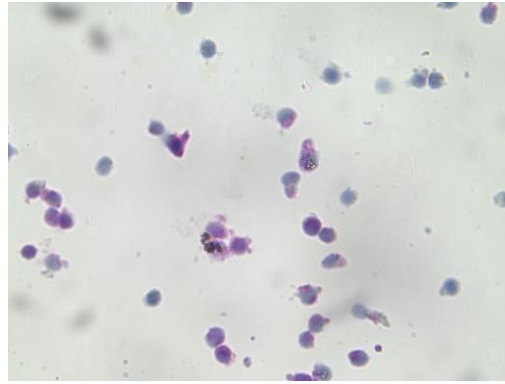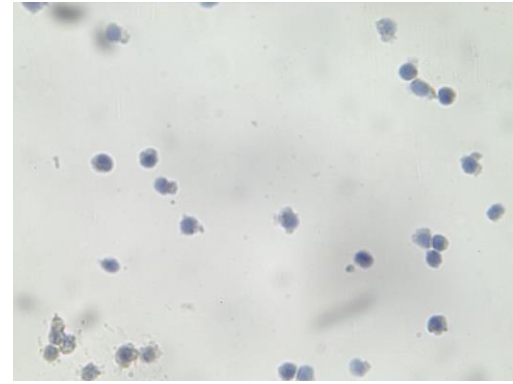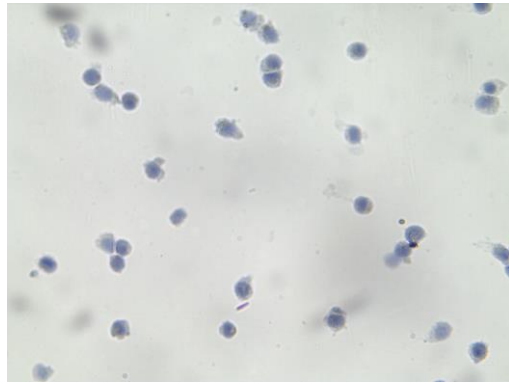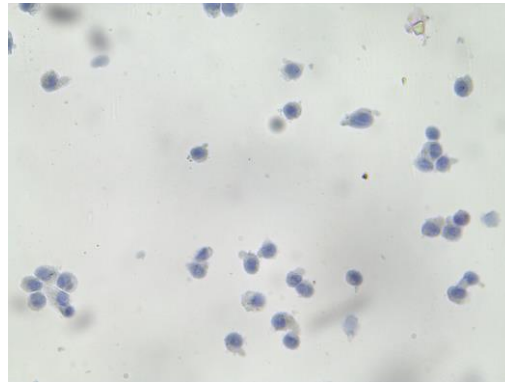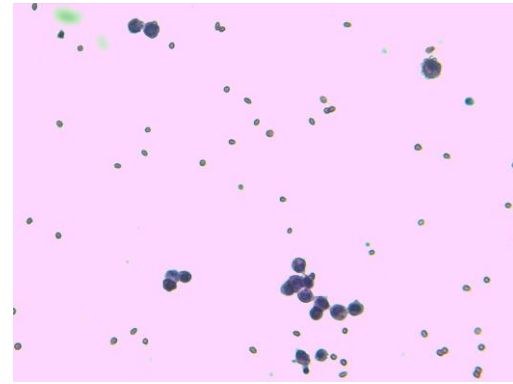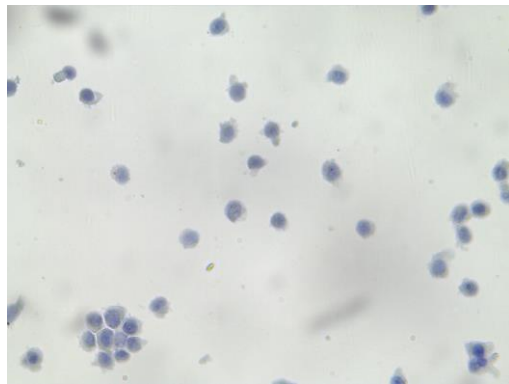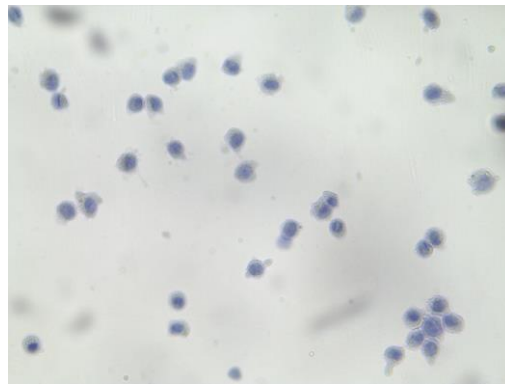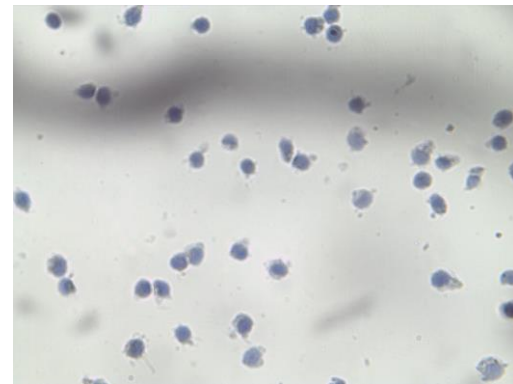

C57 Mice  
2 h post-nebulization with S-RBD

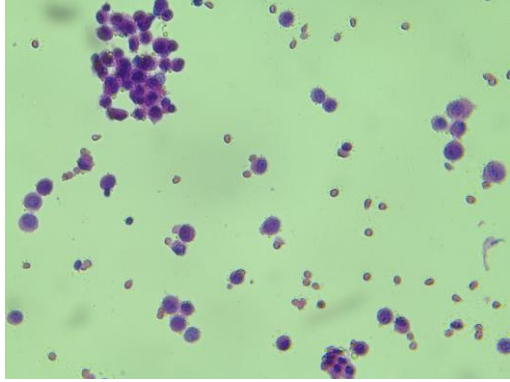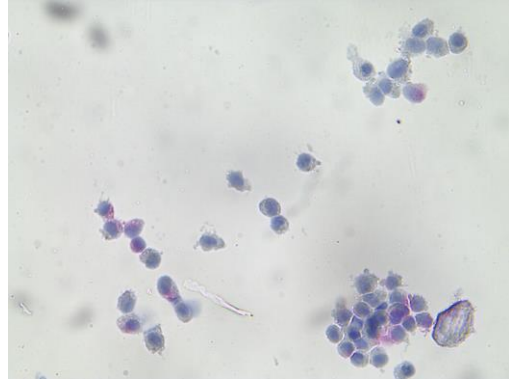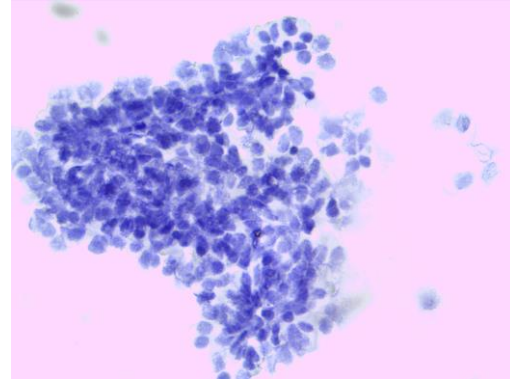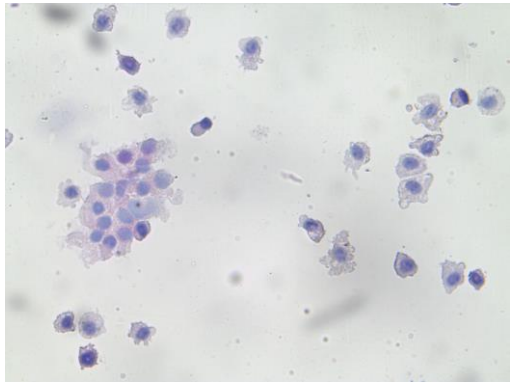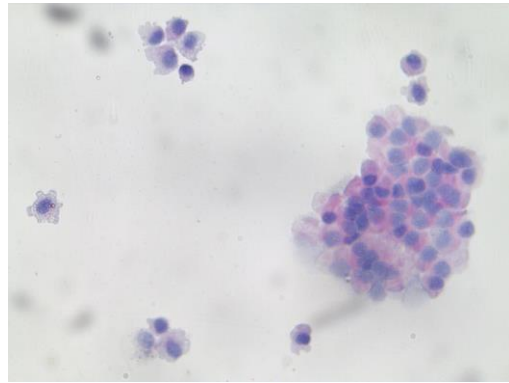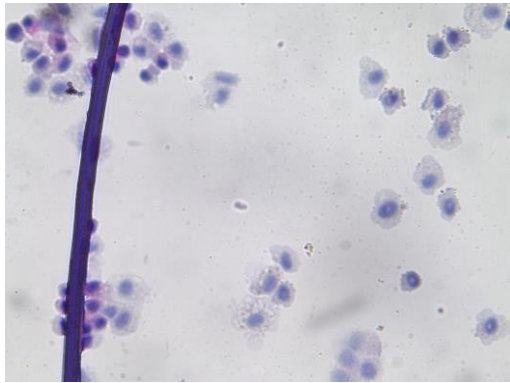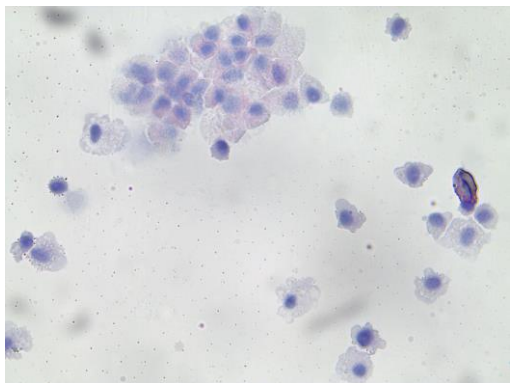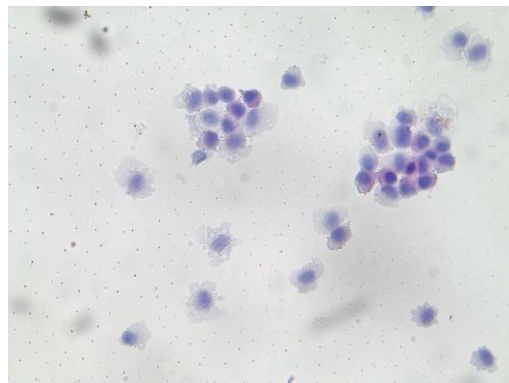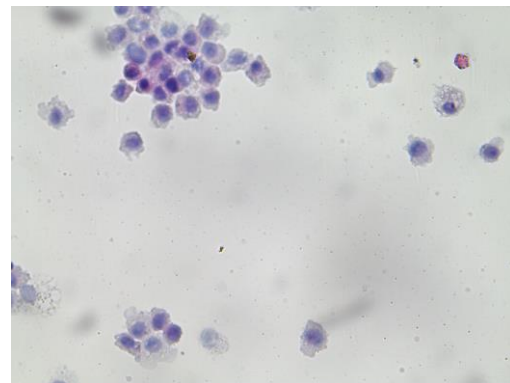

Lps del Mice  
0 h post-nebulization with S-RBD

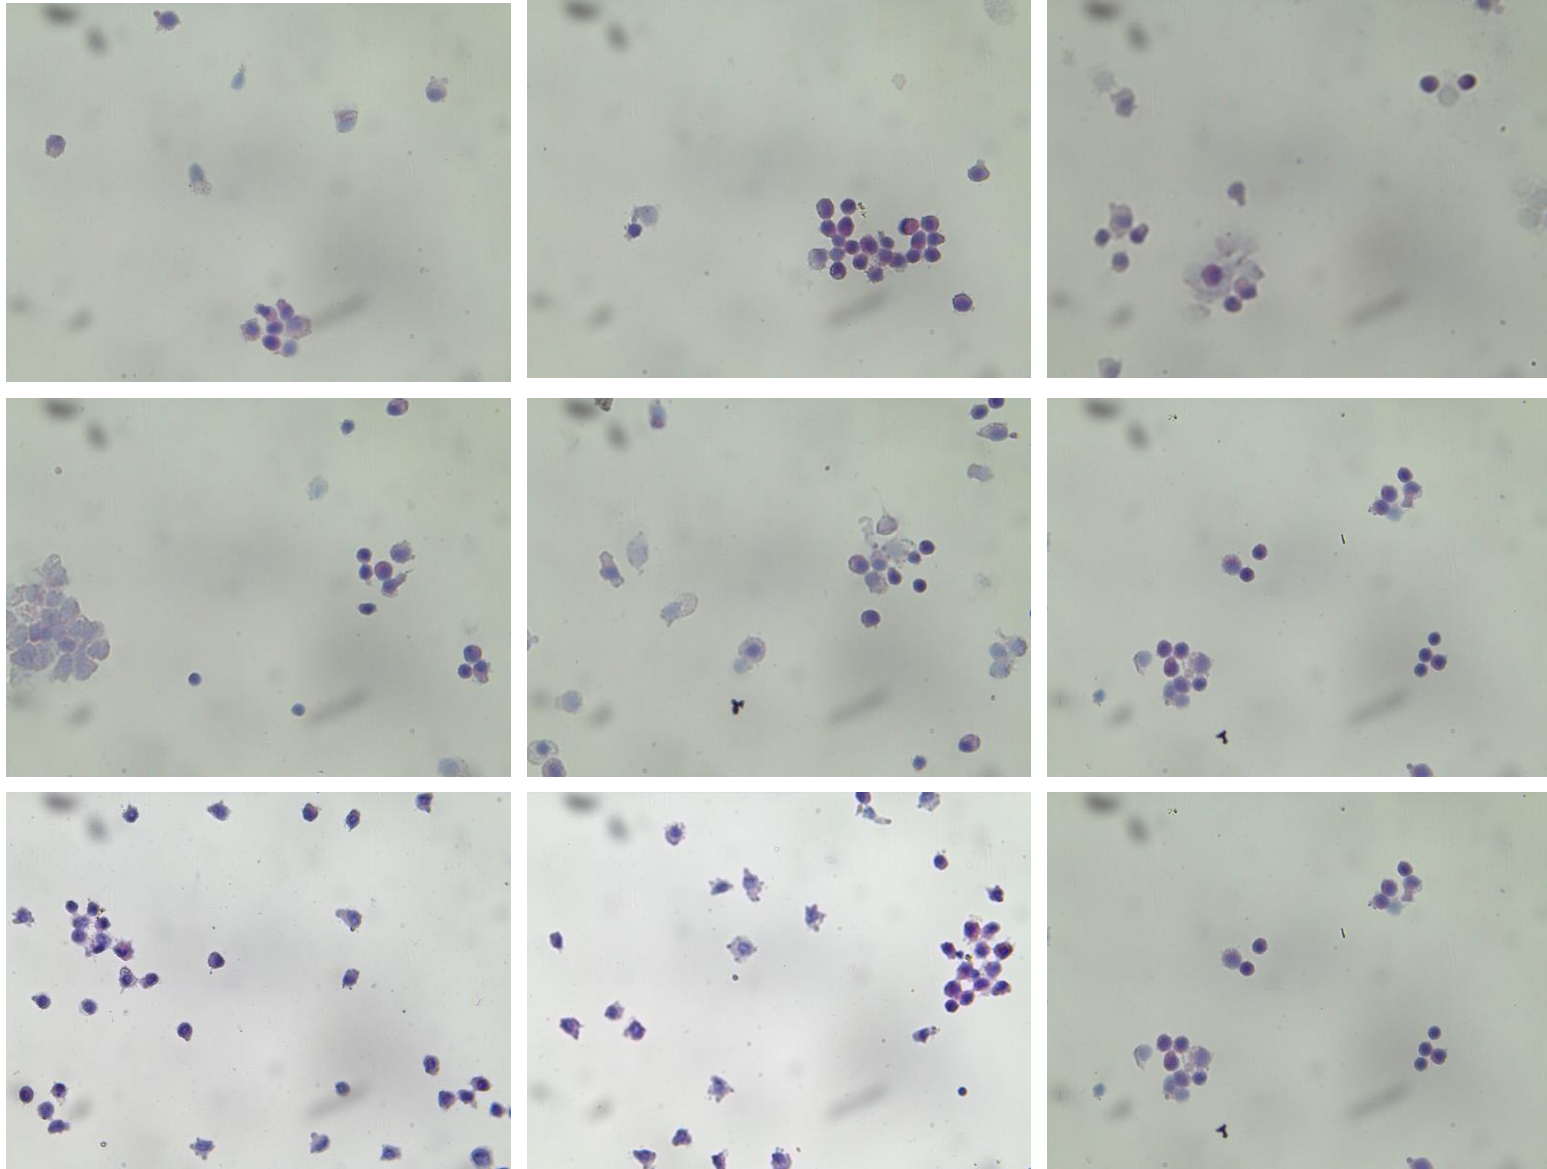

Lps del Mice  
2 h post-nebulization with S-RBD

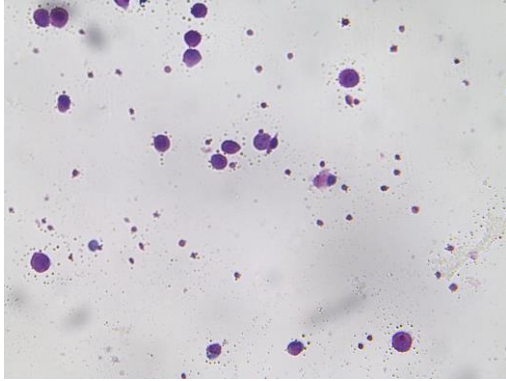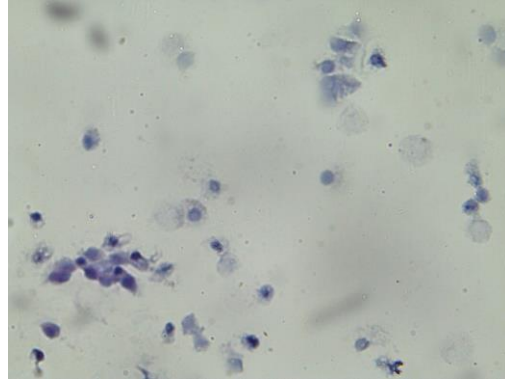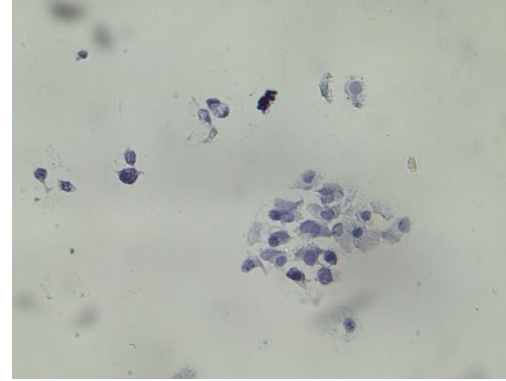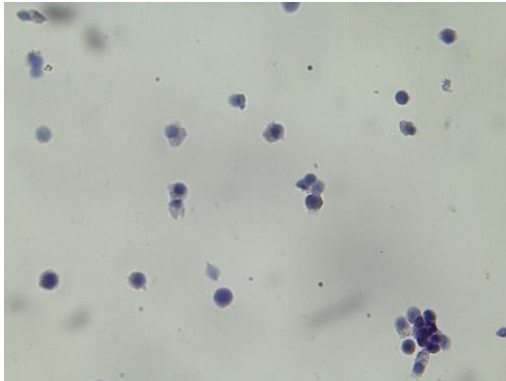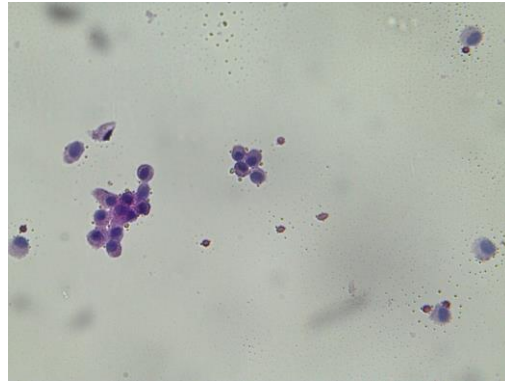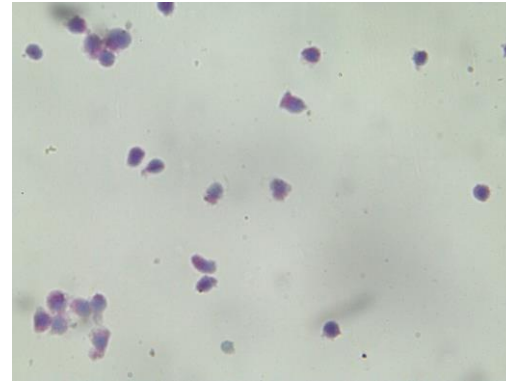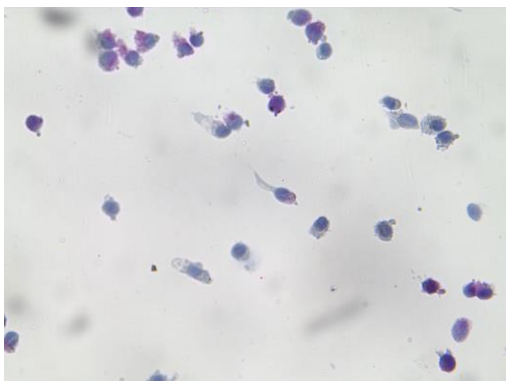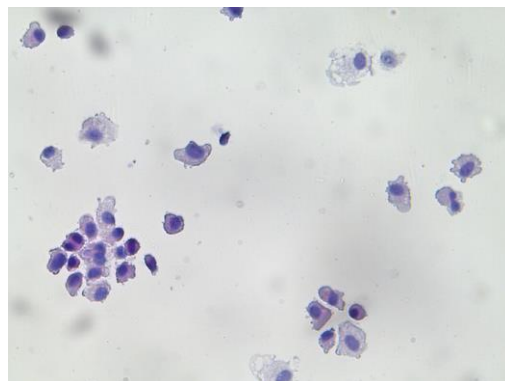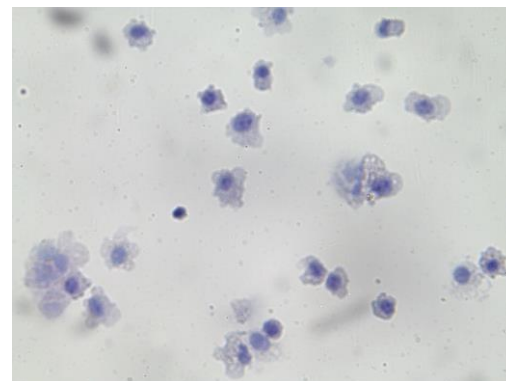

Supplement: 43440_2022_398_MOESM3_ESM.pdf [file 43440_2022_398_MOESM3_ESM.pdf]
